# Supplementary material
Source: PubMed Central journal article supplement (PMC10203968)
Supplement: jamacardiol-e231525-s002.pdf [file jamacardiol-e231525-s002.pdf]

## **Data Sharing Statement**

Selvaraj. Age Dependency of Cardiovascular Outcomes with the Amyloidogenic pV142I Transthyretin Variant Among Black Individuals in the US. *JAMA Cardiol.* Published May 22, 2023. doi:10.1001/jamacardio.2023.1525

### **Data**

**Data available:** No

### **Additional Information**

**Explanation for why data not available:** Data may be obtained through the ARIC committee with the appropriate approval.
